# Supplementary material for: Characterization of High-Artemisinin Yielding Artemisia annua Bioecotypes Using Gene-Specific STS Markers and HPLC
Source: Research Square preprint supplement (doi:10.21203/rs.3.rs-7265007/v1), 2025-12-17
Supplement: Supplementary file 1 [file 2ae4a264917dfd9de137b613.pdf]

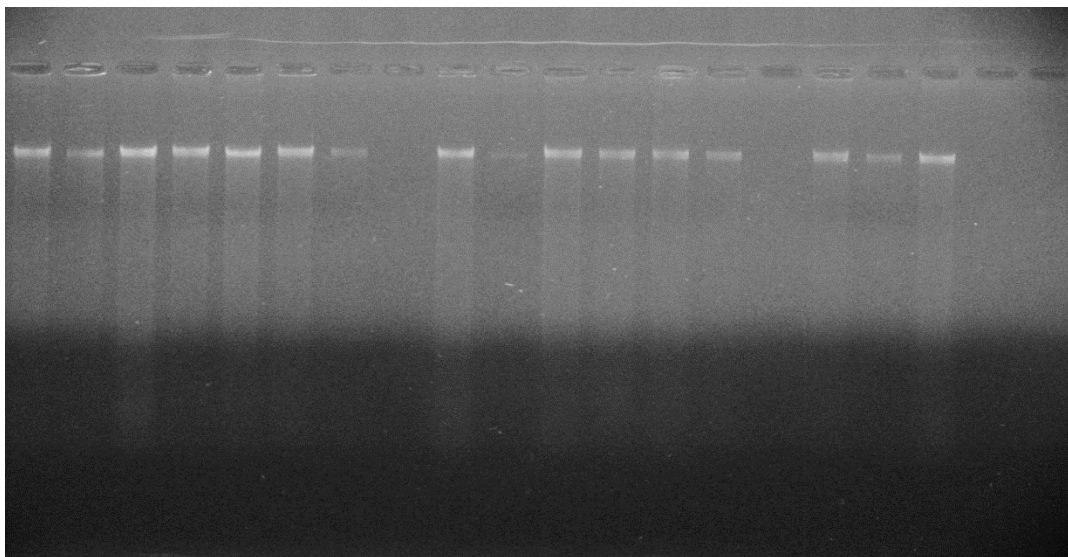

**Supplementary Figure S1.** Full-length, uncropped agarose gel corresponding to Figure 1. The gel was run with 17 genomic DNA samples of *Artemisia annua* biotypes using a CTAB extraction method. Lanes are unedited and shown as originally captured. The gel was photographed using UV transillumination without digital enhancement.
